# Supplementary material for: Preoperative malnutrition is a risk factor for prolonged postoperative ileus for patients undergoing gastrointestinal surgery
Source: Front Nutr. 2025 Apr 9;12:1561264. doi: 10.3389/fnut.2025.1561264 (PMC12014431; doi:10.3389/fnut.2025.1561264)
Supplement: Supplementary file 1 [file Table_1.xlsx]

## Sheet: Sheet1
team	NRS2002	PG-SGA	age	gender	BMI	smoke	drink	Alcohol	Type	stage	method	time	Total protein	Albumin	Prealbumin	Triglyceride	cholesterol	Cholinesterase	Uric Acid	K+	Mg+	P+	Hb	lymphocyte
0	1	2	63	2	23.2	0	0	0	1	2	1	310	65.2	41.2	265	1.05	4.91	10050	310	3.83	0.97	1.12	139	1.93
0	0	0	50	1	23.1	1	1	0	1	1	1	340	67.2	42.1	317	1.63	4.81	8689	310	4.03	0.9	1.23	138	2.83
0	0	1	62	1	20.3	1	0	0	1	2	1	255	64.3	42.4	287	1.41	7.47	10841	354	4.52	0.88	1.18	127	2.18
0	1	2	56	1	27	1	1	0	1	1	1	170	60.7	41.4	279	1.69	5.21	10919	319	4.05	0.92	1.26	149	1.85
0	1	2	68	1	24	0	0	0	1	2	1	210	60.5	42.1	277	0.58	4.6	7117	311	4.02	0.85	1.03	116	2.03
0	0	1	66	1	26.3	0	0	0	1	1	1	190	75.5	49	294	1.78	6.1	12343	385	4.32	1.03	1.11	167	2.2
0	1	1	71	1	29.7	1	1	0	1	1	1	310	63.2	40.5	277	1.26	5.02	8125	507	4.01	0.89	1.1	125	2.14
0	0	0	64	2	23.7	0	0	0	1	1	1	195	63.3	39.7	242	1.59	6.52	8814	296	4.08	1.04	1.44	134	2.19
0	1	2	68	2	21	0	0	0	1	1	1	270	74.6	42.1	228	0.8	7.42	7575	365	3.87	0.88	1.22	129	1.38
0	0	1	68	1	23.3	1	1	0	1	1	1	145	75.2	44.2	345	1.04	5.16	8708	220	4.31	0.93	0.82	157	2.14
0	0	0	46	2	22.8	0	0	0	1	1	1	280	71.1	44.2	305	0.8	4.97	10075	235	4.87	0.86	0.97	134	1.7
0	0	1	67	1	24.5	1	1	0	1	1	1	270	66.7	40.4	321	1	4.28	9408	358	4.93	0.83	1.07	148	1.92
0	1	2	51	1	25.6	1	1	1	1	1	1	300	60.5	40.3	303	0.67	3.46	7264	315	4.33	0.87	1.16	105	0.89
0	0	0	43	1	23.1	1	0	0	1	2	1	170	57.9	39.1	316	1.26	5.02	10303	329	4.78	0.89	1.1	144	2.49
0	1	1	59	1	24.5	1	1	0	1	2	1	320	65	41.3	282	1.71	5.44	7671	336	4.35	0.9	1.11	104	1.79
0	0	0	41	2	24	0	0	0	1	2	1	570	61.7	40.7	181	1.26	5.02	5621	180	4.2	0.89	1.1	95	1.23
0	1	1	58	2	24.4	0	0	0	1	1	1	190	69.2	40.1	217	1.45	5.61	10404	278	4.35	1.08	1.29	123	1.9
0	0	1	65	1	27	0	0	0	1	1	2	180	68.1	38.9	277	1.22	4.59	7914	310	3.95	0.9	0.96	143	2.62
0	0	0	34	1	32.4	0	0	0	1	1	1	200	65.6	47.7	350	1.14	5.59	8867	375	5.04	0.82	1.02	150	1.97
0	0	0	58	2	32.4	0	0	0	1	2	1	280	78.7	39.8	253	1.67	5.86	11316	286	4.66	0.99	1.4	133	2.54
0	1	1	76	1	22.7	1	0	0	1	1	1	280	63.3	38.2	285	1.16	5.05	7961	348	4.57	0.96	0.95	139	1.48
0	0	0	54	1	30.4	1	0	0	1	1	2	210	62.7	41.5	226	1.95	3.67	10228	332	4.17	0.81	0.99	176	2.14
0	0	0	52	1	21	1	1	0	1	2	2	190	57.9	38.6	204	1.44	5.74	6330	215	4.42	0.91	1.23	130	1.96
0	0	1	65	1	27.9	1	0	0	1	2	1	180	64.9	40.4	223	1.26	5.02	6298	338	4.6	0.89	1.1	153	1.99
0	1	1	74	2	24.9	0	0	0	1	1	1	195	67.6	41.8	222	0.85	6.79	8088	262	3.61	0.91	0.85	121	2.85
0	1	1	68	1	24.8	1	0	1	1	1	1	290	70.9	41	168	0.74	4.72	7406	269	4.13	0.81	1.02	143	1.35
0	1	1	62	1	25.4	0	0	0	1	1	2	185	67.7	44.9	259	0.7	4.65	7727	199	4.21	0.93	0.91	150	2.27
0	0	1	65	1	25.6	0	0	0	1	1	1	310	70.6	42.3	278	1.12	6.21	9888	318	3.68	0.92	1.13	155	1.1
0	0	0	58	1	22.9	1	1	0	1	2	1	160	61.3	38.9	304	2.98	4.53	7172	310	5.15	0.82	1.17	157	2.47
0	0	0	64	1	22	1	0	0	1	1	1	120	59	40.3	266	0.94	5.34	5180	293	4.25	0.91	1.23	127	1.51
0	1	1	60	2	23	0	0	0	1	1	1	325	67.4	42.8	303	1.35	5.94	10378	209	3.81	0.92	1.08	124	2.42
0	0	1	63	1	23	1	1	0	1	1	1	190	61.16	41.69	270.9	1.26	5.02	5931	225	4.99	0.89	1.1	149	1.43
0	1	1	55	1	24.2	0	0	0	1	2	2	180	67.3	41.5	250.9	0.75	4.33	5968	338	4.24	0.89	1.04	82	0.91
0	0	0	63	1	24.4	0	0	0	1	2	2	195	69.1	41.9	236.5	1.51	6.13	8586	294	3.75	0.85	0.77	147	2.34
0	0	1	69	1	25.4	0	0	0	1	1	2	150	67.4	44.8	219.9	1.14	5	8171	457	4.58	0.85	0.94	152	1.36
0	0	0	60	1	26	1	0	0	1	1	2	205	77.3	45.1	215	0.84	4.72	8796	277.5	4.38	0.92	1.03	155	2.07
0	0	0	61	1	25.4	1	1	0	1	2	1	245	70.4	44.8	319	1.38	6.2	10192	459	4.01	0.85	0.93	174	1.68
0	0	1	69	1	21.6	1	1	0	1	2	1	180	60.46	40.75	258.6	1.26	5.02	9355	376	3.87	0.89	1.1	144	3.23
0	0	0	64	2	27.8	0	0	0	1	1	2	175	63.8	41.9	296	1.44	5.37	9101	223	3.5	0.93	1.05	127	1.78
0	0	0	44	2	25	0	0	0	1	1	1	280	67.6	42	232	0.83	3.54	6662	311.3	3.63	0.83	1.17	102	1.42
0	1	2	65	1	25.6	0	0	0	1	2	1	245	71.01	47.67	393.3	1.81	5.99	9102	332	4.73	0.96	1.2	135	2.81
0	0	0	54	1	20.3	1	1	0	1	2	1	165	65.41	42.87	312.5	1.26	5.02	8092	255	4.43	0.89	1.1	147	2.22
0	1	1	83	1	26.4	0	0	0	1	1	2	190	66.7	38.3	207	1.52	3.54	7334	429	3.93	0.91	0.97	128	1.91
0	1	1	69	1	28.5	1	1	0	1	2	1	220	71.57	47.14	258.9	1.26	5.02	8992	300	4.71	0.89	1.1	168	2.13
0	1	2	56	1	21.7	1	1	0	1	2	1	160	66.15	40.06	355.8	1.26	5.02	10226	400	4.32	0.89	1.1	150	1.93
0	0	0	58	1	25.7	0	0	0	1	1	1	185	68.26	43.62	296	0.81	5.59	8214	254	3.89	1.01	1.06	152	2.01
0	0	1	60	2	25.7	0	0	1	1	1	1	145	60.4	38.1	221	1.21	7.44	6704	236.8	4.15	0.92	1.23	128	1.62
0	1	2	67	1	18.7	1	0	0	2	2	1	200	70.63	46.42	323.3	0.74	4.24	7239	216	4.7	0.91	1.13	137	2.03
0	1	1	44	2	33.2	1	0	0	2	1	2	200	77.4	41.9	260.4	1.5	4.47	10899	424	4.25	0.87	1.5	109	2.29
0	0	0	60	1	20.8	1	1	1	2	2	1	195	68.8	45.42	251.2	1.26	5.02	6094	332	4.18	0.89	1.1	108	2.5
0	0	0	40	2	20.4	0	0	0	2	1	2	115	65.02	41.51	277.3	1.26	5.02	10526	317	3.73	0.89	1.1	137	1.92
0	1	1	67	2	29.8	0	0	0	2	2	1	175	71.7	43.4	192	1.84	4.38	7498	266	3.61	0.78	1.11	107	1.63
0	1	2	72	2	27.8	0	0	1	2	1	2	300	67.24	38.68	304.8	1.35	4.12	9537	231	4.34	0.87	1.11	114	1.8
0	0	1	67	1	30.5	0	0	0	2	2	2	100	74.8	45.1	238	0.82	6.37	10269	265	4.49	0.89	1.12	138	2.07
0	0	1	73	1	27.7	1	1	0	2	2	1	150	67.85	43.45	226.7	1.46	5.76	6878	336	4.28	0.99	1.06	154	1.64
0	1	2	61	1	24.6	1	0	0	2	1	1	175	64.29	38.26	290.7	1.3	5.52	7960	452	4.55	0.78	1.02	104	1.04
0	1	1	74	2	27.8	0	0	0	2	2	1	130	66.49	41.02	280.7	1.26	5.02	8395	202	4.64	0.89	1.1	95	2.72
0	1	2	53	1	25.1	1	1	0	2	1	1	160	60.93	39.2	262.1	1.22	4.96	7211	461	4.04	0.95	1.06	166	3.14
0	0	0	60	2	20	0	0	0	2	1	2	110	67.4	42.3	245	0.8	7.23	7174	221	3.87	0.88	1.19	119	2.01
0	1	1	75	2	26.6	0	0	0	2	1	1	145	63.4	39.58	80.8	1.26	5.02	4145	177	4.03	0.89	1.1	122	1.23
0	0	0	30	1	23.5	1	0	0	2	1	1	350	61.69	39.13	264.4	1.78	3.84	8667	494	4.3	0.8	1.18	119	2.11
0	1	1	73	2	23	0	0	0	2	2	1	180	71.4	39.1	230	1.57	5.62	7756	244	4.28	0.91	0.97	110	2.87
0	0	1	67	2	27.5	0	0	0	2	1	1	150	64.12	38.55	197.9	1.56	5.53	8330	383	3.36	0.8	1.07	136	2.87
0	1	2	71	2	20.8	0	0	1	2	1	1	175	65.57	39.25	225.8	1.45	3.42	7846	223	4.33	0.98	1.21	132	2.27
0	0	0	57	1	24.1	0	0	0	2	1	1	190	64.4	43.57	311.2	2.04	6.76	7827	377	4.48	0.8	1.04	134	2.48
0	0	0	42	2	23.7	0	0	1	2	2	2	70	66.8	39.4	234.3	1.7	4.86	7815	239	3.9	0.82	0.91	129	1.62
0	0	0	57	1	26	1	1	0	2	2	1	210	67.33	39.31	226.7	1.23	4.22	5581	280	4	0.88	1.11	129	1.13
0	1	1	69	2	19.9	0	0	0	2	1	1	150	71.9	43.2	192	1.2	3.58	8405	173	3.99	0.88	0.96	125	1.8
0	0	0	63	1	22.1	0	0	0	2	1	1	105	66.5	40.1	234.7	1.32	4.33	7424	279	4.13	0.8	0.99	138	1.62
0	1	2	65	2	25.7	0	0	1	2	1	2	100	69.9	41.6	195	1.11	5.01	8706	279	3.79	0.93	0.84	125	1.23
0	0	0	58	1	24.2	0	0	0	2	1	2	170	63.1	39.7	270.3	1.51	3.91	10188	358	3.84	0.82	1.03	157	1.97
0	0	0	55	2	32.9	0	0	0	2	2	2	170	70.7	42.5	267	1.25	5.02	10572	259.4	3.94	0.82	0.97	121	2.01
0	0	1	68	1	21.6	1	1	1	2	1	1	170	62.38	43.67	315.2	1.2	4.47	8838	290	4.43	0.86	1.19	144	1.06
0	0	0	54	1	21.2	0	0	0	2	1	2	55	65.7	39.9	305.8	0.86	4.28	7268	273	4.06	0.8	1.15	144	2.29
0	0	0	52	1	30.5	0	0	0	2	1	1	100	60.15	40.79	296.7	1.26	5.02	8931	339	3.78	0.89	1.1	128	1.27
0	1	1	72	1	23	1	0	0	2	2	1	125	69.63	46.41	244.7	1.26	5.02	6763	275	5.21	0.89	1.1	90	1.27
0	1	1	60	2	24.8	0	0	0	2	2	1	120	72.13	43.1	235.8	1.26	5.02	8363	213	4.12	0.89	1.1	146	2.14
0	0	0	33	1	30.7	0	0	0	2	2	1	220	63.56	43.1	361.1	1.26	5.02	10892	308	4.02	0.89	1.1	138	1.3
0	1	2	72	1	26.6	0	0	1	2	2	1	155	71	47.14	270.9	0.89	4.34	8065	248	4.65	1.05	1.12	148	1.29
0	1	2	44	1	19.6	0	0	0	2	1	2	185	76.1	47.6	329	0.67	4.86	7979	332.3	4.05	0.85	1.18	148	1.77
0	0	0	45	2	27.8	0	0	0	2	1	1	180	68.69	44.87	237.9	0.76	5	8389	207	4.27	0.87	1.09	85	2.4
0	1	1	72	1	20.4	1	1	0	2	2	2	185	75.2	43.4	228	1.24	5.06	7379	337.3	3.85	0.95	1.01	151	1.91
0	0	1	67	1	20.9	0	0	0	2	2	2	80	71.7	41	305	1.21	3.6	11798	486	3.77	0.86	1.09	140	1.94
0	0	1	69	1	25.6	0	0	1	2	2	2	145	75.5	43.1	335.4	2.93	5.35	9055	402	3.64	0.88	1	147	1.8
0	1	1	56	1	28.3	1	0	0	2	1	1	120	66.11	43.47	314.8	1.26	5.02	9035	356	4.78	0.89	1.1	165	2.18
0	0	0	55	1	23.8	1	0	0	2	1	1	140	61.04	41.6	284.5	2.35	5.44	9797	361	4.04	0.88	1.19	161	2.98
0	0	0	44	2	26.2	1	1	1	2	2	2	180	70.65	47.22	269.4	1.26	5.02	8590	194	4.37	0.89	1.1	144	2.12
0	0	0	41	1	22.5	1	0	0	2	2	1	260	65.65	45.26	303.5	0.68	4.12	10443	340	3.93	0.88	0.96	143	1.61
0	0	0	52	2	25.6	0	0	0	2	1	1	130	68.35	41.09	205.2	1.3	4.74	9217	223	4.14	0.97	1.35	119	2
0	1	1	70	2	24.6	0	0	0	2	1	2	280	63.5	40.5	241	1.37	4.3	12050	280	3.5	0.85	1.15	143	1.83
0	1	1	76	1	28.2	1	1	0	2	1	1	125	65.49	41.11	220.9	1.06	3.76	6876	230	4.06	0.94	1.11	79	1.5
0	0	0	60	1	25.4	0	0	0	2	2	1	140	78.55	47.61	361.9	1.81	6.27	9926	404	3.94	0.95	1.14	133	1.79
0	1	1	77	1	22.8	1	1	0	2	2	1	160	64.92	41.73	172.4	0.7	4.28	5774	237	3.83	0.84	0.92	139	0.96
0	0	1	53	1	26.1	1	1	0	2	2	2	195	70.7	40.6	227	1.02	3.62	7773	308.2	4.11	0.82	1	145	2.5
0	0	0	51	1	23.8	0	0	1	2	1	2	155	68.1	40	161	0.82	4.51	7065	204	3	0.83	0.93	122	0.96
0	1	1	78	2	22.2	0	0	0	2	1	2	90	73.1	38.3	183.4	2.23	6.56	8441	230	4.82	0.91	1.2	108	2.67
0	1	2	47	1	17.6	1	0	1	2	2	2	160	69	43.6	121	1.5	5.59	7153	350.1	4.2	0.83	0.84	122	0.97
0	1	1	55	2	23.8	0	0	1	2	1	2	180	81.4	46	296	2.52	5.67	10729	324.7	4.89	0.88	1.13	135	1.64
0	1	2	69	2	26.7	0	0	1	2	2	1	210	71.06	48.07	247.6	0.88	4.17	7464	198	4.38	0.83	1.26	132	1.87
0	0	1	68	2	24.8	0	0	0	2	2	2	85	82.2	43.1	265	3.67	6.51	9742	286	3.87	0.77	1.16	132	3.28
0	1	1	47	2	22	0	0	0	2	1	2	90	63.5	41	232	1.14	4.5	8086	238	3.58	0.81	1.4	141	2
0	0	1	67	1	24.5	0	0	0	2	1	2	105	71.6	43.6	248.2	1.01	4.02	7824	349	4.54	0.86	1.13	113	1.84
0	0	0	63	2	23.4	0	0	0	2	1	2	90	68.2	42.8	309	1.51	7.19	9199	287	3.71	0.82	1.03	136	2.28
0	0	0	57	1	25.7	1	1	0	2	2	1	145	64.45	43.97	307.4	1.26	5.02	7186	400	3.81	0.89	1.1	125	0.78
0	0	1	68	2	21.3	0	0	0	2	1	1	155	72.1	41.3	269.1	1.49	3.88	6753	231	4.56	0.81	0.99	128	2.14
0	0	0	57	2	25.1	0	0	0	2	2	1	165	70.73	41.71	270.2	1.26	5.02	6946	200	4.09	0.89	1.1	122	0.46
0	0	0	52	1	20.5	0	0	0	2	1	1	210	62.8	38.9	291	1.64	4.81	8895	346	4	0.84	1.04	146	1.92
0	0	1	68	1	18.7	0	0	0	2	2	1	215	74.2	44.7	282	0.98	4.9	7682	255.5	5.12	0.86	1.16	133	0.57
0	0	0	60	2	27.5	0	0	1	2	1	2	220	64.9	44.3	335	1.14	4.23	7080	274.6	3.77	0.88	1.22	114	1.62
0	1	1	79	1	28	0	0	1	2	1	2	260	69.5	42.4	220	0.54	4.55	10691	261.9	4.56	0.91	1.16	169	1.22
0	1	1	70	2	31	0	0	1	2	1	1	230	65.1	40.94	215.2	1.23	4.64	8298	336	3.85	0.96	1.14	132	1.91
0	0	0	62	1	24.1	1	1	0	2	1	1	175	61.42	41.06	254.2	0.75	5.48	8648	286	4.57	0.85	1.36	170	1.62
0	0	0	55	1	28.4	1	1	0	2	2	1	245	70.41	45.07	373.2	1.26	5.02	8390	359	4.29	0.89	1.1	116	0.41
0	1	1	58	2	24.8	0	0	0	2	1	1	180	65.2	41.4	219	1.18	4.65	9249	305	4.07	0.97	1.26	153	2.13
0	0	1	68	1	23	0	0	0	2	1	1	180	71.6	44.3	296	1.65	3.95	8872	313	4.29	0.84	0.83	142	1.35
0	1	2	68	1	26.8	0	1	0	2	1	2	170	65.6	40	270	3.41	4.01	10805	452	4.13	0.93	1.12	118	0.83
0	1	1	64	1	24.7	0	0	1	2	2	1	165	65.8	40.9	242.1	1.12	5.48	9094	291	4.1	0.89	0.93	155	1.97
0	0	0	49	2	21.7	0	0	0	2	1	1	210	67	41.7	270	2.67	5.23	8835	316	3.91	0.79	1.17	128	1.69
0	1	3	64	1	19.2	1	1	0	2	2	2	80	66.9	39.8	251.7	0.72	4.61	6538	326	4.1	0.88	1.39	115	0.66
0	1	2	58	1	18.5	0	0	0	2	1	2	110	73	43	231.7	1.23	5.16	7548	342	4.18	0.94	0.86	138	1.96
0	0	0	57	2	28	0	0	1	2	1	1	260	63.26	38.54	268.5	1.95	6.1	9986	352	4.07	0.96	1.19	132	1.2
0	1	2	46	2	19.9	0	0	0	2	2	1	240	62.1	38.5	238	1.44	4.42	7960	208	3.63	0.88	1.33	94	1.02
0	1	1	77	2	26.9	0	0	0	2	1	1	220	69.3	41.6	290.2	2.23	5.98	9299	495	3.9	0.84	1.09	139	1.39
0	0	1	36	2	18.9	0	0	0	2	2	1	200	64.3	42.36	237.2	1.26	5.02	6626	160	4.02	0.89	1.1	121	1.1
0	0	1	68	1	31.8	1	0	1	2	2	1	135	66.3	40.9	182.1	0.76	4.22	7988	387	3.63	0.84	1.25	140	1.63
0	1	2	60	1	17.9	1	1	0	2	2	2	100	67	41.3	215.9	1.45	7.47	9517	300	4.09	0.84	1.04	139	1.63
0	0	1	66	2	24	0	0	0	2	1	1	350	65.9	40.1	249.1	1.31	4.17	7690	264	4.05	0.8	1.01	119	1.85
0	0	0	56	2	22.8	0	0	0	2	1	1	175	75.6	47.19	318.1	1.36	6.81	7180	310	4.8	0.87	1.1	130	2.23
0	1	2	27	1	17.5	1	1	0	2	1	2	115	75.9	50.5	226.1	0.96	4.76	14021	554	4.46	0.82	1.11	169	1.7
0	0	1	69	1	29.4	0	0	0	2	2	2	130	71.9	43.1	283.2	1.6	5.32	9489	358	4.11	0.98	1.22	149	2.57
0	0	0	47	1	28.7	0	0	1	2	1	1	110	75.1	49.7	392	1.62	5.72	11360	430.9	3.7	0.84	1.17	172	1.72
0	0	1	65	1	27.8	0	0	0	2	1	1	150	61.9	41.68	379.9	1.26	5.02	8266	289	3.9	0.89	1.1	148	1.88
0	0	0	60	1	29.1	1	0	0	2	1	1	220	71.56	49.73	368.1	1.9	4.34	10727	461	3.82	0.81	1.03	139	0.98
0	1	2	71	2	27.3	0	0	0	2	2	1	120	66.16	39.59	320.7	1.26	5.02	8316	329	4.78	0.89	1.1	101	2.52
0	0	1	67	2	25.6	0	0	1	2	1	1	180	73.7	41.4	260.3	0.69	4.87	8813	302	4.1	0.79	1.07	120	1.94
0	1	2	56	1	23	1	1	0	2	2	1	110	60.35	39.21	305.4	1.26	5.02	8627	318	4.13	0.89	1.1	135	0.65
0	0	0	51	2	21.9	0	0	1	2	2	1	140	74.3	44.1	283	1.3	5.36	11211	287	3.97	0.95	0.89	127	2.26
0	1	1	70	1	21.9	1	0	0	2	1	2	105	65.1	40.1	277	1.69	5.86	7728	295	4.14	0.9	0.99	136	1.41
0	0	0	54	2	28	0	0	0	2	1	1	115	69.32	44.49	319.9	2.15	7.23	10198	331	4.62	0.95	1.23	137	3.26
0	1	1	71	2	22.5	0	0	0	2	1	1	100	65.24	41.92	239.7	1.26	5.02	9616	202	4.51	0.89	1.1	123	2.28
0	1	1	55	2	23.1	0	0	0	2	2	1	160	71.16	44.39	288.3	0.88	6.44	9316	237	4.19	0.99	0.95	137	1.64
0	0	1	69	1	20.8	1	1	0	2	2	1	215	63.6	39.3	225	0.69	4.12	6966	255	3.86	0.75	0.98	132	1.37
0	1	2	65	2	23.6	0	0	1	2	2	1	205	68.18	45.65	279.4	1.26	5.02	8001	311	3.52	0.89	1.1	135	0.74
0	0	0	63	1	25.3	1	0	1	2	1	2	100	74	40.6	279	1.26	4.55	9501	289	4.09	0.97	1.02	162	1.32
0	1	2	74	2	24.4	0	0	0	2	1	2	110	72.8	41.6	244	0.96	3.51	9024	272	4.15	0.77	1.11	140	1.96
0	1	1	64	1	27.7	1	1	0	2	2	1	155	72.03	48.26	388.9	1.82	5.9	10897	323	4.49	0.94	0.99	150	1.68
0	0	2	67	1	17.4	0	0	0	2	1	1	150	76.06	48.18	308.2	1.26	5.02	7615	305	4.63	0.89	1.1	143	1.28
0	0	0	48	1	22.8	0	0	0	2	1	1	265	62.4	40	343	0.69	5.56	9758	347	4.12	0.83	1.1	143	1.54
0	1	1	71	1	27.2	1	1	0	2	1	1	185	69.29	42.95	293.8	1.61	6.82	8497	402	4.26	0.92	0.86	139	2.15
0	0	1	66	1	23.8	1	1	0	2	1	2	150	64.5	42.8	291	0.56	3.88	7570	335.8	4.25	1.02	1.41	142	0.8
0	1	1	71	1	25	1	1	0	2	1	1	150	66.7	39	249	1	4.26	7966	356.3	4.68	0.91	0.95	161	1.68
0	1	1	73	1	24.2	0	0	0	2	2	1	190	74.1	42.6	224.5	0.96	4.99	9071	360	4.18	0.89	0.76	147	1.68
0	0	0	58	1	24	1	1	0	2	2	1	260	73.1	40.2	253	1	3.79	10113	251.7	3.91	0.88	1.18	133	1.09
0	1	1	57	1	24.5	0	1	0	2	2	1	3.5	63.6	43.56	249.9	1.09	4.69	9357	370	4.37	0.87	1.22	159	1.07
0	0	0	56	1	26	1	1	1	2	2	2	110	62.1	40.8	280	2.78	4.19	9666	434	4.13	0.86	1.25	152	1.72
0	1	1	56	1	24.8	1	0	0	2	2	1	215	73.2	46.7	403	1.38	4.71	10334	281.4	4.87	0.86	0.97	158	1.89
0	0	1	53	2	26.1	0	0	0	2	1	1	315	66.36	42.06	266.5	0.67	4.58	9035	223	3.75	1.07	1.29	131	0.44
0	1	1	47	1	24.9	0	0	0	2	2	1	110	72.9	49.67	347.6	1.26	5.02	6981	419	4.6	0.89	1.1	153	1.9
0	0	1	67	1	24.5	0	0	0	2	2	2	90	75.1	45	266.3	0.42	4.62	8390	395	4.45	0.89	0.96	142	1.52
0	0	1	66	1	21.5	1	1	1	2	1	2	120	66.2	40.5	281	1.22	5.11	7922	355	4.38	0.84	0.96	149	2.14
0	1	1	59	1	21.6	1	1	0	2	1	1	165	76.37	52.42	297.5	1.43	6.44	10051	175	4.28	0.95	1.06	154	1.38
0	0	0	48	2	25.7	0	0	0	2	1	1	150	76.3	48.7	272	1.42	6.31	10454	339.1	3.9	0.91	1.08	150	1.9
0	1	1	46	1	23.3	0	0	0	2	1	1	185	68.27	39.87	266.2	1.16	3.94	9058	277	3.71	0.91	1.12	120	1.24
0	0	1	49	1	20.4	0	0	0	2	2	1	250	80.2	47.9	257	0.37	4.64	8263	538	4.27	0.82	1.13	130	0.69
0	0	1	66	1	21.5	1	1	0	2	2	2	120	66.5	46.4	313.3	1.29	5.05	7296	231	4.47	0.99	0.96	149	1.69
0	0	0	33	2	22.8	0	0	0	2	1	1	200	65.5	38	232	1.62	5.03	8426	255	3.99	0.82	0.9	133	2.09
0	1	1	54	2	23.4	0	0	0	2	1	1	200	61.82	38.05	199.3	0.81	4.51	8474	208	4.08	0.86	1.08	121	2.08
0	1	2	55	1	22.7	0	0	0	2	2	1	180	67.7	44	256	1.66	4.47	9794	263	4.1	0.85	0.87	150	1.3
0	1	2	65	1	19.3	0	0	0	1	2	1	100	57.6	36.9	112.8	0.98	3.85	6067	262	3.76	0.9	0.94	142	2.04
0	1	2	69	1	21.5	0	1	0	2	2	1	170	61.3	35.5	206.5	0.53	3.35	7045	402	3.33	0.78	1.09	89	0.98
0	0	0	40	1	26.7	1	0	0	2	1	2	95	69.6	42.5	222	1.17	4.49	7624	315	4.38	0.91	0.95	85	1.81
0	1	1	55	2	21.7	0	0	0	2	1	1	175	61.3	38.1	187	2.16	5.44	6819	243	3.53	0.85	1.17	114	1.62
0	0	1	54	2	25.8	0	0	0	1	1	1	220	65.5	39.2	216	1.57	5.64	7836	138	3.89	0.9	1.17	139	2.57
0	1	1	80	1	24.7	1	1	0	2	1	1	100	55.8	34.3	183	1.16	4.16	6412	204	3.56	0.76	0.85	125	2.4
0	0	1	66	1	28.3	1	1	0	2	1	2	110	64.7	41	230.5	2.63	7.81	11656	408	3.69	0.91	1.31	149	1.81
0	1	1	56	2	19.3	0	0	0	2	1	1	95	60.89	37.5	192.9	1.26	5.02	7432	236	3.99	0.89	1.1	105	1.8
0	1	1	39	2	26.7	0	0	1	2	2	1	150	65.5	36.5	220	1.06	3.94	8140	266	3.6	0.85	1.03	132	1.8
0	1	1	76	1	21.1	1	0	0	2	1	2	120	65.3	34.8	185.5	0.6	4.46	5999	264	4.43	0.8	0.86	134	0.89
0	0	0	62	1	26	1	1	0	2	1	1	120	58.2	34	258.2	0.96	3.96	8702	303	3.65	0.83	0.88	149	1.59
0	0	0	58	1	26	1	0	0	1	1	1	325	60.6	40.5	205	1.23	4.29	8222	402	4.28	0.89	0.96	147	2.96
0	1	2	70	2	22.2	0	0	0	1	1	1	210	61.48	35.26	171.3	1.45	4.49	6406	389	3.64	0.91	1.08	90	1.53
0	0	0	59	1	23.9	1	1	1	1	1	1	180	58.5	38.4	234	0.61	4.97	6718	259	4.24	0.84	1.1	150	2.56
0	0	1	68	1	26.4	0	0	0	1	2	2	195	71.5	39	211.9	1.34	4.14	7013	347	4.69	0.88	1.14	134	1.03
0	1	2	48	2	23.5	0	0	1	1	2	2	215	60.1	35.3	223	0.71	6.83	6910	418.9	3.68	0.83	1.2	119	1.16
0	0	2	65	2	24.7	0	0	0	1	2	1	300	58.22	37.28	290.5	1.07	4.86	7380	280	4.04	0.91	1.31	117	1.84
0	0	2	58	1	22	1	1	0	1	2	2	130	57.9	35.3	233	0.96	5.95	6050	348	4.19	0.86	1.25	156	1.4
0	1	1	76	2	27.3	0	0	1	1	1	2	200	60.5	36.1	181.8	1.77	3.09	8396	251	4.21	0.84	1.06	122	0.99
0	1	2	69	1	20.6	0	0	0	1	1	2	135	64.4	39.5	286.4	1.53	5.04	8762	268	3.95	0.88	0.89	140	0.83
0	1	2	69	1	25	1	1	1	1	1	1	265	64.22	39.45	229.4	1.75	4.16	7863	261	3.68	0.88	1.09	139	1.58
0	0	1	66	1	26	0	0	0	1	1	1	180	50.73	35.98	257.6	1.26	5.02	6572	335	3.2	0.89	1.1	131	2.49
0	1	2	72	1	21.7	0	1	0	1	2	2	155	61.6	31.6	122	0.54	2.13	4934	247	4.51	0.92	1	90	2.63
0	1	1	77	1	25.4	0	0	0	1	2	2	220	51.4	35.7	222	1.47	3.72	4794	414.5	4.22	0.82	1.04	131	6.3
0	1	2	77	1	24.2	1	1	0	1	1	1	165	60.3	36.9	236	1.19	4.78	5701	351	3.92	0.91	1.01	154	2.02
0	0	0	61	1	20.5	1	1	0	1	1	2	170	57.5	36.7	237	1.03	3.29	6378	361	4	0.89	1	151	2.35
0	1	2	53	1	29.4	1	1	0	1	2	2	250	59	36	309	0.91	4.28	6785	315.9	4	0.92	1.3	144	2.06
0	1	1	72	2	22.3	0	0	0	2	1	1	170	63.5	38.1	281.2	1.44	5.31	9654	234	4.54	1.01	1.34	142	2.73
0	0	0	61	1	22.3	1	1	0	2	1	1	220	60.75	35.51	277.5	0.87	4.68	6977	282	3.8	0.8	1	121	1.96
0	1	1	50	1	24.2	1	0	0	1	1	1	210	65.73	43.43	235.9	1.02	3.51	6518	275	3.74	0.89	1.1	143	1.66
0	0	1	68	1	22.5	1	1	1	1	1	1	215	66.53	42.79	196.4	0.89	4.1	7664	227	3.89	0.96	1.03	131	1.74
0	1	1	58	1	22.6	1	1	0	1	1	1	145	69.01	45.95	264.2	0.52	6.43	8549	185	4.44	0.91	0.95	144	3.19
0	0	0	62	1	21.3	1	1	0	1	1	1	145	60.43	41.39	344.5	1.36	4.84	7323	363	4.57	0.82	1.36	148	1.99
0	0	0	46	1	24.5	0	0	1	1	1	1	240	77.69	51.07	378.3	1.7	5.45	12020	425	4.68	0.75	1.22	179	2.41
0	1	2	70	1	22.7	0	0	0	1	1	1	285	63.5	35.6	189.3	0.41	5.65	8043	308	3.49	0.87	1.15	156	1.93
0	0	1	69	2	20.6	0	0	0	1	1	1	290	71.97	44	298.1	1.34	5.19	9535	268	3.49	0.83	1.14	140	1.46
0	1	3	56	2	20.2	0	0	0	1	2	2	170	59.3	36.2	163	0.49	4.63	4310	167.4	3.99	0.84	1.2	122	0.86
0	0	1	65	1	25.2	0	0	0	1	1	1	200	71.02	46.21	361.3	0.61	5.78	9623	304	4.82	0.89	1.09	155	1.4
0	0	0	51	2	23.6	0	0	1	1	2	1	150	63.79	39.9	302.6	1.26	5.02	4211	258	4.44	0.89	1.1	120	2.87
0	1	2	61	1	21.5	1	1	1	1	2	2	240	64.2	37.7	235	0.78	4.18	4476	251.6	4.49	0.93	1.12	119	1.44
0	1	1	70	2	21.2	0	0	0	1	1	2	145	76.3	47.6	270	0.99	6.7	11244	343	3.98	0.8	1.13	145	1.9
0	1	1	72	1	26.2	1	0	1	1	1	1	170	75.51	45.21	305.4	1.26	5.02	8535	446	4.87	0.89	1.1	159	3.1
0	0	1	66	1	24.9	1	1	1	1	1	1	210	66.07	44.95	323.8	1.02	4.96	7651	442	4.07	1.04	1.08	132	2.19
0	1	2	72	1	22.6	1	1	0	1	1	1	180	63.24	36.83	193	1.85	6.38	5374	261	4	0.81	0.95	132	1.15
0	1	1	63	1	26.6	1	1	0	1	1	1	250	76.61	47.24	316.2	1.42	5.13	8535	510	3.8	1.01	0.86	163	1.8
0	1	2	53	2	26.6	0	0	0	1	2	1	300	57.93	34.72	203.1	1.26	5.02	8742	162	3.39	0.89	1.1	136	1.62
0	1	2	74	1	23.3	1	1	0	2	1	2	165	64.6	36.7	243	0.7	4.59	4766	244.7	4.57	0.89	1.3	132	1.14
0	0	0	63	1	22.5	0	0	0	1	1	2	120	64.1	39.5	223.2	0.68	4.2	8710	324	3.97	0.87	1.07	112	2.23
0	0	0	58	1	24	1	1	0	1	1	2	230	67.3	38.2	293	2.12	4.44	7780	383	4.13	0.85	1.21	136	2.63
0	0	0	61	1	26.4	1	1	0	1	2	2	200	69.2	41.5	268	0.98	5.17	7933	312.9	4.55	0.95	1.21	84	1.46
0	1	1	78	2	22.7	0	0	0	1	1	1	205	74.1	43	223	0.99	6.23	8048	344.1	4.26	0.9	1.19	142	2.96
0	1	3	80	1	22.1	0	0	0	1	1	2	225	58.99	37.04	180.3	0.51	3.34	4780	276	4.1	0.94	1.04	82	0.61
0	1	2	63	1	21.5	1	1	0	1	1	2	200	68.3	39.8	196	2.02	6.4	7877	314.8	4.64	0.87	1.23	127	1.9
0	1	2	67	2	25.2	0	0	0	1	1	1	265	61.04	37.95	252.7	1.77	5.38	8364	347	3.72	1.03	1.29	139	3.08
0	1	2	78	2	24.4	0	0	0	1	2	2	255	72.6	44	154	1.49	3.93	7669	434.4	5.5	0.91	1.19	110	1.55
0	1	2	44	1	27.8	0	0	0	1	2	2	150	69.7	45.4	299	1.05	4.5	9410	316	4.18	0.81	0.93	157	1.95
0	1	2	51	1	27.1	0	0	0	1	1	1	240	73	52.3	219	2.05	6.32	9930	425.6	3.91	0.96	1.13	154	2.15
0	0	0	58	2	22.3	0	0	0	1	1	1	135	76.02	45.92	402.2	1.1	6.81	10401	323	4.3	0.89	1.1	139	1.86
0	1	0	64	1	28.3	0	0	0	1	1	1	210	72.8	43.1	278	0.67	5.26	7910	317	4.01	0.83	1.03	115	0.98
0	1	1	78	1	21.5	0	0	0	1	2	1	110	64.16	41.49	245.5	0.36	4.74	6974	292	4.12	0.89	1.1	129	1.55
0	0	1	68	1	27.7	0	0	1	1	1	1	360	73.4	44.1	289.2	1.22	6.26	9260	348	4.26	0.93	0.92	120	0.87
0	1	1	80	2	27.5	0	0	0	1	2	1	185	70.4	41.6	202	1.72	3.56	7974	405.2	4.18	0.98	0.99	113	0.89
0	1	1	61	2	23.7	0	0	0	1	2	2	215	71.7	38.7	183	0.77	4.41	8112	242	4.63	0.95	1.08	88	1.57
0	1	1	58	1	24.2	1	1	0	1	2	1	235	73.5	46.8	252	1.76	5.84	8580	365.7	4.32	0.95	1.26	156	2.04
0	1	2	73	1	24.3	0	1	0	1	1	2	120	61.1	34.6	244	0.93	4.17	6152	195	3.68	0.8	0.75	118	1.2
0	1	1	63	1	22.6	0	0	0	1	2	2	175	66.5	43	330	0.81	5.9	7940	308	4.11	0.9	1	157	1.9
0	0	1	68	2	21.7	0	0	0	1	1	2	160	59.1	38.5	254	0.7	6.17	9668	257	3.92	0.92	1.33	123	1.76
0	1	1	71	1	27	1	1	0	1	1	1	265	69.79	42.06	262.9	1.81	4.53	9297	414	4.09	0.95	0.85	142	1.45
0	1	2	69	2	21.4	1	0	0	1	1	1	260	66.86	46.17	216	1.04	3.92	6410	144	4.06	0.93	1.26	91	1.42
0	1	1	72	1	24.9	1	1	1	1	1	1	290	68.88	39.22	258.2	0.85	5.56	8357	317	4.39	0.77	0.72	134	1.4
0	1	1	70	1	23.4	1	1	0	1	1	1	280	70.77	46.13	394.8	1.64	7.29	8300	419	4.67	0.88	1.12	169	1.87
0	0	0	62	2	25	0	0	0	1	1	2	110	63.8	39.6	214	1.46	5.8	8293	280	3.94	0.97	1.23	105	1.11
0	1	2	76	1	17.4	1	0	0	1	1	2	150	79.4	48.1	270.9	0.58	6.8	9080	264	4.12	1	0.87	170	2.56
0	0	0	59	1	29	1	1	0	1	1	1	240	67.12	43.79	280	0.75	3.01	7857	450	4.28	0.89	1.1	145	1.3
0	1	1	50	2	26.2	0	0	0	1	1	2	180	72.5	39.9	167	0.68	4.74	7049	295.7	3.82	0.85	1.13	121	0.87
0	1	1	58	1	30.1	1	0	0	1	2	1	290	64.13	39.81	236	1.18	5.04	8145	302	3.75	0.97	1.17	147	2.91
0	1	1	72	1	22.1	0	0	0	1	1	1	210	70.83	42.63	293.3	1.15	5	6820	231	4.34	0.89	1.1	164	1.51
0	1	1	71	2	27.3	0	0	1	1	1	2	160	64.3	37.3	160.8	1.42	5.63	8844	393	3.91	0.89	1.28	101	1.62
0	0	0	63	2	26	0	0	0	1	1	1	210	68.3	44.1	161	0.7	5.9	8635	263.8	3.07	0.99	1.24	112	1.37
0	1	3	70	2	20.2	0	0	0	1	1	2	225	65.5	39.4	174	1.01	5.34	6340	375.7	3.88	0.77	1.08	83	0.83
0	1	3	66	1	19.8	0	0	0	1	1	1	225	60.7	37.5	160	0.71	5.12	4533	388.7	4.59	0.93	1.24	115	1.71
0	0	0	61	1	24.9	0	0	0	1	1	2	195	68.5	44.9	245	0.79	4.28	7328	313.7	3.8	0.87	1.04	163	1.42
0	1	2	33	2	17.9	0	0	1	1	1	1	185	80.6	53.5	270	0.63	5	9499	273.3	4.22	0.97	1.21	148	3.25
0	0	1	63	2	27	0	0	0	1	1	1	225	75.4	42.9	258	2.06	6.4	9781	272.7	3.26	0.86	1.25	146	1.31
0	0	0	67	1	29.4	1	1	0	1	1	1	165	70.69	45	303.8	2.28	5.66	9640	367	4.11	0.89	1.1	110	2.94
0	1	1	56	1	21.8	1	0	0	1	1	2	155	69	43.2	316	1.53	6.83	7121	248	4.38	0.82	1.07	145	2.44
0	1	1	63	1	20.6	1	1	0	1	1	1	195	65.9	41.2	219	0.65	3.23	6168	175.3	4.41	0.87	1.39	80	1.68
0	1	2	51	1	25.2	1	1	0	1	1	1	130	61.07	41.01	280.5	1.37	4.93	8670	318	4.14	0.89	1.1	155	1.5
0	1	1	71	1	32	1	0	0	1	1	1	225	74.8	43	197	0.67	5.55	7612	294.9	4.18	0.84	1.16	107	1.98
0	1	1	71	1	22.4	1	0	0	1	1	1	135	74.98	50.75	317	1.88	6.75	10245	272	4.83	0.89	1.1	162	1.89
0	0	0	62	1	29	0	0	0	1	1	2	225	70.8	44.3	381.8	1.9	3.71	9942	555	4.39	0.9	0.86	153	2.36
0	1	1	80	2	25.5	0	0	0	1	1	1	180	66.4	37.75	165.1	0.51	3.2	6142	212	4.68	0.81	1.09	118	1.44
0	1	1	71	1	22.2	1	0	0	1	2	2	165	71.4	44.9	252	0.9	4.2	8205	343	4.07	0.97	0.85	142	1.49
0	1	2	62	1	22.8	1	1	0	1	1	1	265	65.1	40.7	175	1.03	4.76	7055	322.4	4.1	0.9	1.25	153	2.03
0	1	2	70	1	17.3	1	1	1	1	1	1	205	62.75	40.77	212.7	1.01	3.87	5877	275	4.39	0.94	1	138	1.7
0	0	0	26	1	24.6	1	0	0	1	1	2	165	71.3	46.3	326	0.63	5.76	10775	428	4.16	0.93	1.18	140	2.64
0	1	1	71	2	32	0	0	0	1	2	1	235	73.9	46.2	259	1.69	4.68	11091	281.6	4.25	0.9	1.23	146	2.06
0	0	0	64	2	23.4	0	0	0	1	1	2	125	62.7	39.8	225.6	1.05	5.29	9446	254	3.66	0.84	1.13	137	1.4
0	1	2	61	1	20.8	0	0	0	1	1	1	160	58.8	37.4	273.5	1.01	5.18	7560	271	3.99	0.85	1.15	149	1.83
0	0	0	62	1	24.6	0	0	0	1	2	2	130	70.7	41.9	307.6	0.84	4.98	5662	288	3.62	0.87	1.1	141	1.62
0	0	0	56	2	27.9	0	0	0	1	2	1	260	70.86	43.97	287.3	1.72	5.85	10716	334	4.34	0.83	1.36	132	3.13
0	1	2	69	1	20.9	1	1	0	1	1	2	155	78.2	36.1	122	0.63	3.63	4284	272.1	3.96	0.81	1.13	115	2.09
0	1	2	75	2	21.3	0	0	1	1	1	2	130	73.1	41	252.6	0.96	5.43	9938	323	4.73	0.77	1.36	125	1.27
0	0	1	65	2	25.2	0	0	0	1	1	2	175	69.9	43.7	212	1.89	5.24	6082	286.5	4.27	0.93	1.26	108	1.47
0	0	0	52	1	23.9	0	0	0	1	1	2	165	77.3	48.7	522.4	4.71	6.89	12744	404	4.66	1.05	1.57	175	4.2
0	1	2	47	1	24.5	0	0	0	1	2	2	180	62.9	40	201.9	0.54	3.8	5207	334	4.79	0.97	1.18	79	1.73
0	1	2	63	1	22.4	0	1	0	1	2	2	240	66.6	36.6	183	0.98	4.5	5576	191	4.04	0.8	1.2	90	1.89
1	1	1	48	1	26.3	1	0	0	2	2	1	280	70.7	42.2	213	0.85	3.58	6918	440.6	4.26	0.76	1.2	102	1.75
1	1	2	63	1	23.9	0	0	0	1	2	2	165	53.2	32.6	142	2.34	3.55	3784	223.4	4.13	0.7	0.84	55	1.96
1	1	2	73	1	24.5	1	0	0	2	2	1	190	71.6	38	144	0.91	3.99	7082	313.3	4.63	0.89	0.93	86	2.7
1	1	2	59	2	19	1	1	1	2	2	2	335	66.9	40.9	216	0.79	5.33	7677	314	3.96	1.01	0.95	126	0.53
1	0	0	58	2	25.8	0	0	1	2	2	1	260	68.6	42.2	254	0.52	3.76	8347	232	4.16	1	1.14	76	1.1
1	1	3	71	1	21.9	0	0	1	2	2	2	155	56.7	27.9	144	0.55	3.39	2817	155.1	4.02	0.71	0.41	73	0.78
1	1	1	70	1	22.4	1	1	1	1	2	2	265	69.5	43.3	355	1.99	5.85	6261	381	4.41	0.89	1.04	150	1.62
1	0	0	61	1	25.4	1	1	0	1	1	1	245	70.4	44.8	319	1.38	6.2	10192	459	4.01	0.85	0.93	174	1.68
1	1	3	72	1	17	0	0	0	1	1	2	175	58.1	30.8	143	0.8	5.35	7253	187.6	4.67	0.87	0.89	120	1.04
1	1	3	78	1	23.4	1	1	0	2	2	2	165	50.2	26.9	144	1.21	5.36	7453	436	4.55	0.81	0.97	78	1.52
1	0	0	61	1	29.7	0	0	1	1	2	2	245	64.1	40.1	196	0.78	3.42	9515	263	3.85	0.82	0.85	139	0.92
1	1	2	41	2	22.2	0	0	1	2	1	1	250	61.2	36.9	194	1.63	5.55	7760	261.3	3.88	0.82	1.06	116	1.56
1	1	3	68	2	23	0	0	0	2	2	2	120	68.62	37.7	252	1.18	4.73	9611	456	4.73	0.89	1.04	102	1.09
1	1	3	63	2	17.6	0	0	0	2	2	1	185	64.3	35.6	139	0.52	4.95	7719	159.1	3.9	0.83	0.92	93	1.22
1	1	2	81	1	27.7	0	0	0	2	2	2	250	52.5	27.9	135	0.68	2.56	4217	446	3.57	0.99	0.82	84	0.94
1	1	3	68	1	23.4	0	0	0	1	2	1	270	56.2	36.4	206	1.11	5.11	6808	295	3.9	0.96	0.84	130	1.07
1	1	2	70	1	23.4	0	0	0	1	1	1	280	69.9	38.8	193	0.56	3.07	6513	343	4.06	0.77	0.87	136	2.35
1	1	3	61	2	23.4	0	0	0	1	2	1	330	65.4	34.8	108	0.91	5.07	5839	225.3	4.36	0.83	1.19	114	0.8
1	1	3	63	2	24	0	0	0	1	1	2	195	66.5	31.9	122.3	1.59	6.04	5718	205	4.09	0.91	1.23	75	2.1
1	1	3	66	1	22.2	1	0	0	1	1	1	270	53.9	32.2	216.5	0.69	4.22	6322	277	4.55	0.83	1.01	83	1.32
1	1	3	70	2	22.8	0	0	0	2	2	1	225	59.8	30.4	95	0.53	4.71	4608	274	4.04	0.98	1.31	70	2.09
1	1	2	71	2	23.6	0	0	1	2	2	1	260	66.49	37.91	150.2	1.18	6.37	6999	234	4.27	0.94	0.93	113	1.43
1	1	2	47	1	26.9	1	1	1	2	1	2	275	55.03	36.45	159.8	1.18	4.73	3632	306	4.2	0.89	1.04	52	1.37
1	0	1	54	2	24.5	0	0	0	2	2	1	190	62.7	37.3	176	0.76	4.55	5872	305.6	3.62	0.89	1.26	96	1.59
1	0	1	65	1	25	1	1	0	2	1	1	185	62.8	39.6	253	1.06	4.96	9656	258	4.06	0.86	0.96	141	2.46
1	0	0	58	2	25.9	0	0	1	2	2	1	150	68.55	42.2	254.1	0.52	3.76	8347	232	4.16	1	1.14	76	1.1
1	1	2	81	1	23.2	0	0	1	2	1	2	135	67.1	33	161	0.71	4.67	8759	310	3.74	0.94	0.89	103	0.45
1	1	2	58	1	26.5	0	0	0	2	2	2	210	68	41.2	187	5.56	4.53	7071	270.5	4.68	0.95	1.5	88	1.72
1	0	0	56	1	22.5	1	1	1	1	1	2	165	72.3	49.1	339	1.77	6.09	7071	305.8	4.21	0.93	1.2	158	2.46
1	0	1	67	2	29.9	0	0	0	1	1	1	225	74.6	47	325	1.9	6.18	11762	301	4.36	1.01	1.18	134	2
1	1	2	90	1	21.8	0	1	0	1	1	2	140	59.7	36.9	234	0.65	4.76	7071	257	4.55	1.03	1.07	144	1.3
1	1	1	72	2	23.7	0	0	0	2	2	2	180	62.1	36.1	145	1.05	4.44	6900	283	3.97	0.94	1.08	116	1.26
1	0	0	60	1	25.9	1	1	0	1	2	1	225	71.2	40.4	312	1.31	5.86	7071	394	4.81	0.91	1.16	148	3
1	1	2	59	1	24.2	0	0	0	2	2	2	260	63.9	35.2	132	1.37	3.77	7788	253.1	4.4	0.82	1.23	115	2.6
1	1	1	42	1	21.1	0	1	0	1	1	2	155	76.2	52.1	405	0.79	4.95	7071	280.6	4.57	0.94	1.41	163	1.78
